# Supplementary material for: Biopolymer Meets Nanoclay: Rational Fabrication of Superb Adsorption Beads from Green Precursors for Efficient Capture of Pb(II) and Dyes
Source: MDPI journal article supplement (doi:10.3390/nano14090766), 2024-04-26
Supplement: s1 [file s1]

## Supplementary Material

# **Biopolymer Meets Nanoclay: Rational Fabrication of Superb Adsorption Beads From Green Precursors for Efficient Capture of Pb(II) and Dyes**

**Jie Qi,† Xue Wang,† Huan Zhang, Xiangyu Liu, Wenbo Wang, Qingdong He, Fang Guo\***

College of Chemistry and Chemical Engineering, Inner Mongolia University, Hohhot 010021, China;  
jieino@163.com (J.Q.); 542446320@qq.com (X. W.); hzhang1989@163.com (H. Z.);  
lxy13257244737@163.com (X.L.); wangwenbo@imu.edu.cn (W.W.); 18847744604@163.com (Q.H.);  
guofang@imu.edu.cn (F. G.)

\* Correspondence: guofang@imu.edu.cn (F.G.)

†These authors contribute equally to the paper.

## Part I: Equations and characterizations

### 1.1 Equations

The experimental data were fitted with kinetic mathematical models: pseudo-first order kinetic model (Equation S1) and pseudo-second order kinetic models (Equation S2).

$$\frac{t}{q_t} = \frac{1}{k_2 q_e^2} + \frac{t}{q_e}$$

(S1)

$$\text{Log}(q_e - q_t) = \log q_e - \frac{k_1 t}{2.303}$$

(S2)

where  $q_t$  and  $q_e$  are the adsorption capacity at time  $t$  and at adsorption equilibrium, respectively (mg/g),  $k_1$  ( $\text{min}^{-1}$ ) and  $k_2$  (g/(mg·min)) are pseudo-first order and pseudo-second order kinetic constants [77].

The adsorption data were fitted with different adsorption isotherm models: Langmuir model (Equation S3), Freundlich model (Equation S4) and Sips model (Equation S5) [78].

$$q_e = k_f C_e^{\frac{1}{n}} \quad (\text{S3})$$

$$q_e = \frac{q_m k_L C_e}{1 + C_e k_L} \quad (\text{S4})$$

$$q_e = \frac{k_s C_e^{\beta_s}}{1 + a_s C_e^{\beta_s}} \quad (\text{S5})$$

where  $q_e$  is the adsorption capacity at adsorption equilibrium state (mg/g),  $q_m$  is the maximum adsorption capacity (mg/g);  $K_L$  is the Langmuir constant related to theoretical monolayer adsorption (L/mg);  $C_e$  is the concentration of adsorbate in solution at adsorption equilibrium state (mg/L);  $K_f$  is the Freundlich adsorption isotherm constant [(mg/L)(L/g)<sup>1/n</sup>];  $n$  is a constant related to the intensity of adsorption [79].  $K_s$  is the Sips model isotherm constant (L/g);  $a_s$  the Sips model constant (L/mg) and  $\beta_s$  the Sips model exponent.

### 1.2 Characterizations

The surface morphologies of composite beads were examined using a Field Emission Scanning Electron microscope (SUPRA55, Carl Zeiss, Germany). The microscopic structure was observed with a high resolution transmission electron microscope (JEM-2100f, JEOL, Japan). Fourier transform infrared (FTIR) spectra were measured with a Nicolet iS10 spectrophotometer (Thermo Fisher, USA). The crystallization state of the composite beads with different clay content was analyzed by a X-ray powder diffractometer (D8 Advance, Bruker, Germany) equipped with a Cu-K $\alpha$  radiation source (40 kV, 40 mA). X-ray photoelectron spectroscopy (XPS) was measured with an ESCALAB Xi+ spectrophotometer (Thermo Fisher Scientific, American). After adsorption process, the composite beads were removed from the solution, and the concentration of residual dye in the solution was tested with a UV1900i UV–Vis spectrophotometer (Shimadzu, Japan). Zeta potentials were tested with a NanoBrook 90Plus Zeta Potentiometer (Brookhaven, USA). The concentration of Pb(II) ions was measured with a ZEEnit 700P Atomic Absorption Spectrometer (Analytic Jena, Germany). The content of Na in SA was determined with an Avio 200 ICP instrument (Perking Elmer, USA).

## Part II. Supplementary Figures

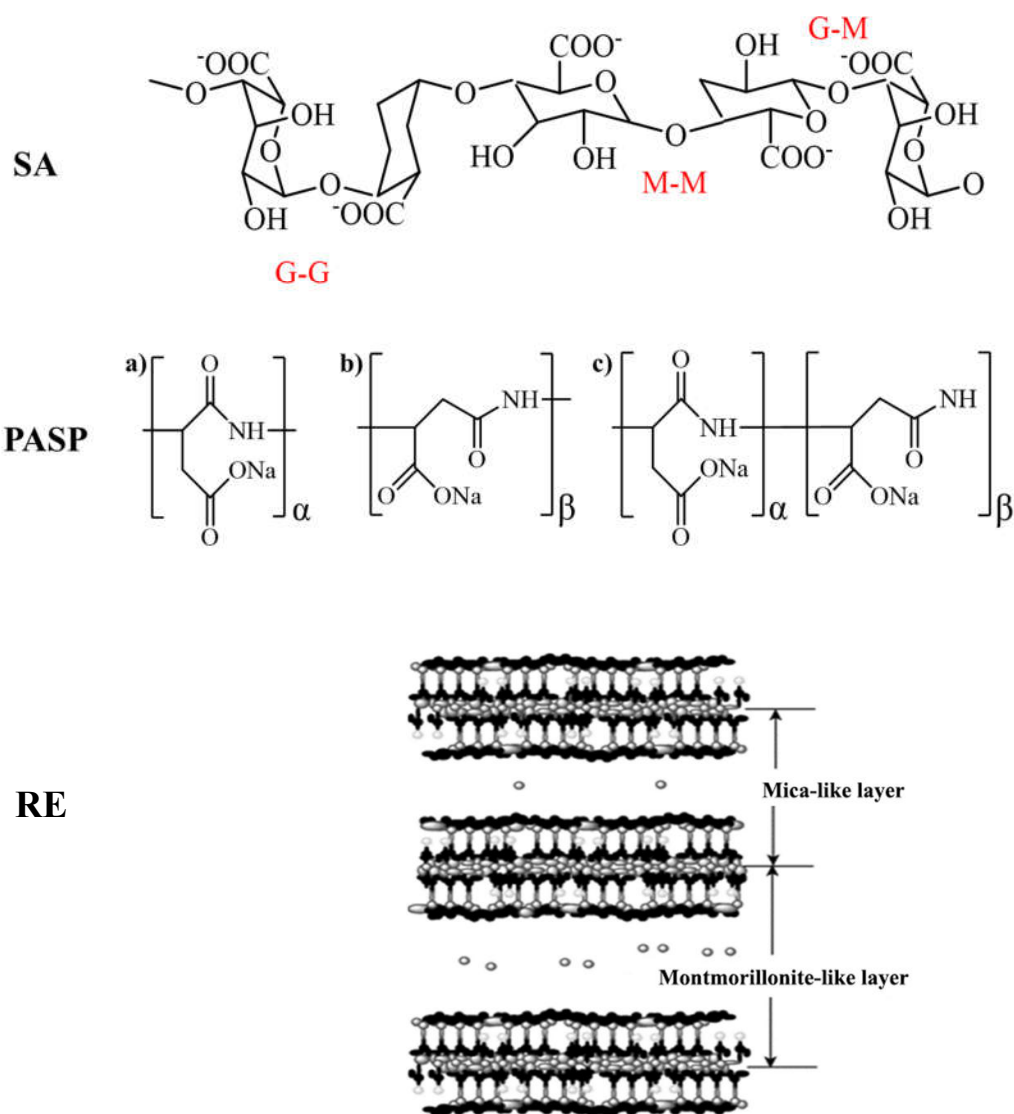

**Figure S1.** The structure scheme of SA, PASP, and RE [80].

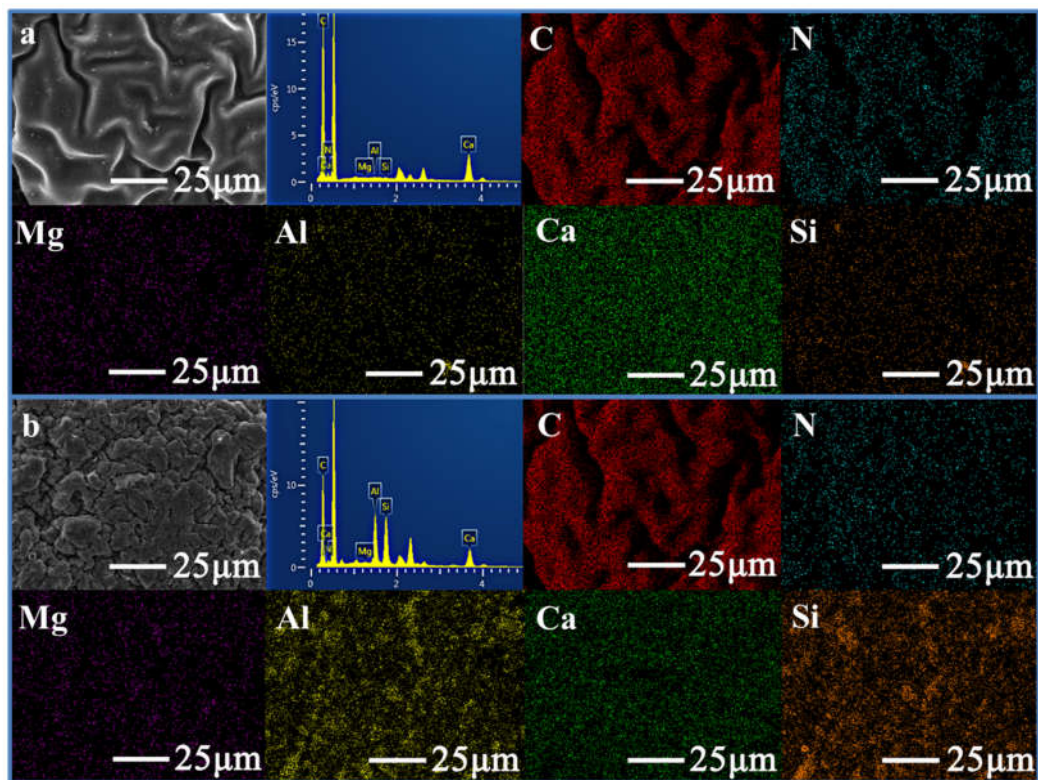

**Figure S2.** (a) SEM images, EDS curves and corresponding element mapping of C, N, Mg, Al, Ca, Si elements in SA/PASP/RE0.6; and (b) SEM image, EDS curves and corresponding element mapping of C, N, Mg, Al, Ca, Si elements in SA/PASP/RE43.

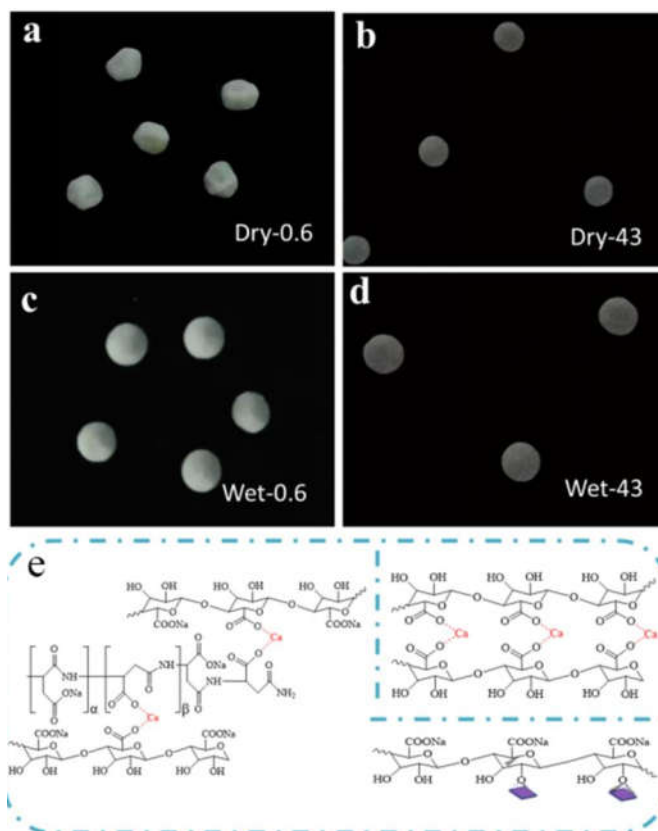

**Figure S3.** The digital photos of the SA/PASP/RE0.6 composite beads: (a) Dry state and (c) Wet-state; and the digital photos of the SA/PASP/RE43 composite beads: (b) Dry and (d) Wet-state; and (e) a scheme for the ion-crosslinking structure.

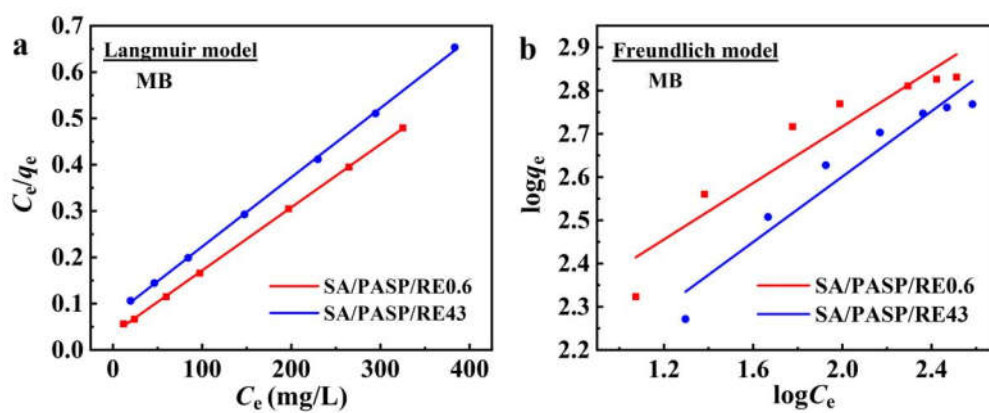

**Figure S4.** The linear fitting curves with Langmuir model (a) and the Freundlich model (b) for the adsorption of MB onto SA/PASP/RE0.6 and SA/PASP/RE43 beads.

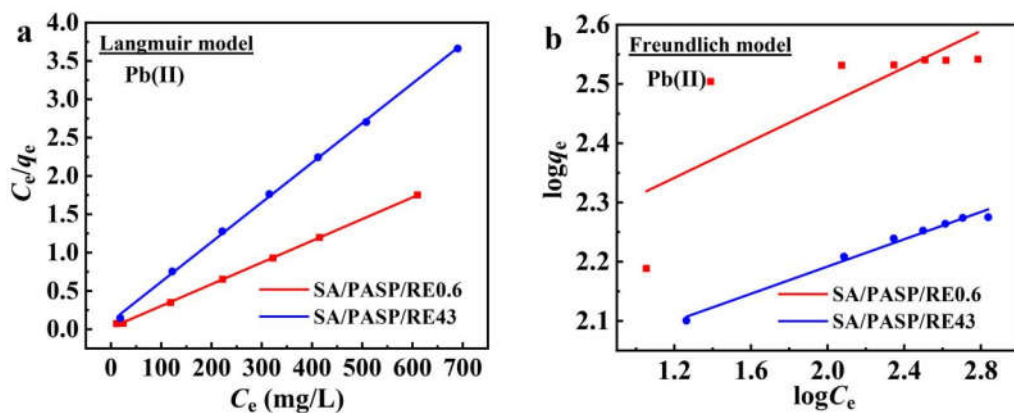

**Figure S5.** The linear fitting curves with Langmuir model (a) and the Freundlich model (b) for the adsorption of Pb(II) onto SA/PASP/RE0.6 and SA/PASP/RE43 beads.

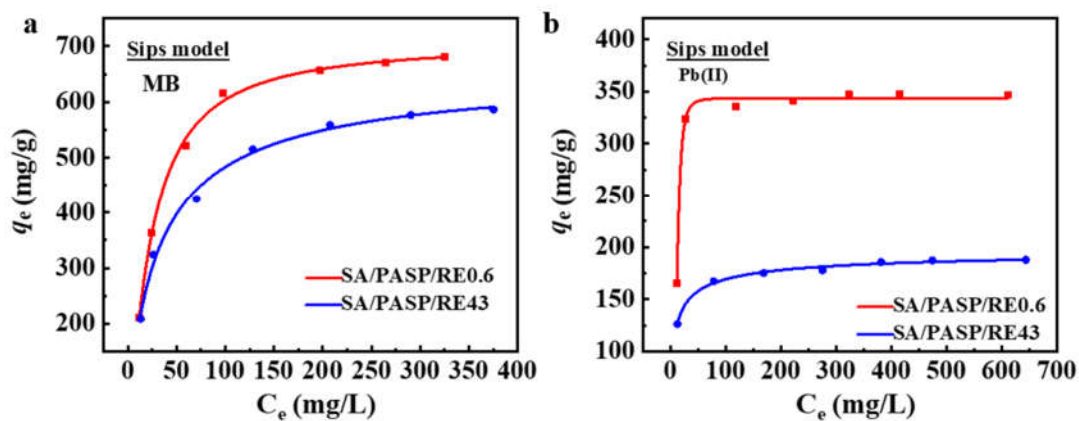

**Figure S6.** The nonlinear fitting curves with Sips model for the adsorption of MB (a) and Pb(II) (b) onto SA/PASP/RE0.6 and SA/PASP/RE43 beads.

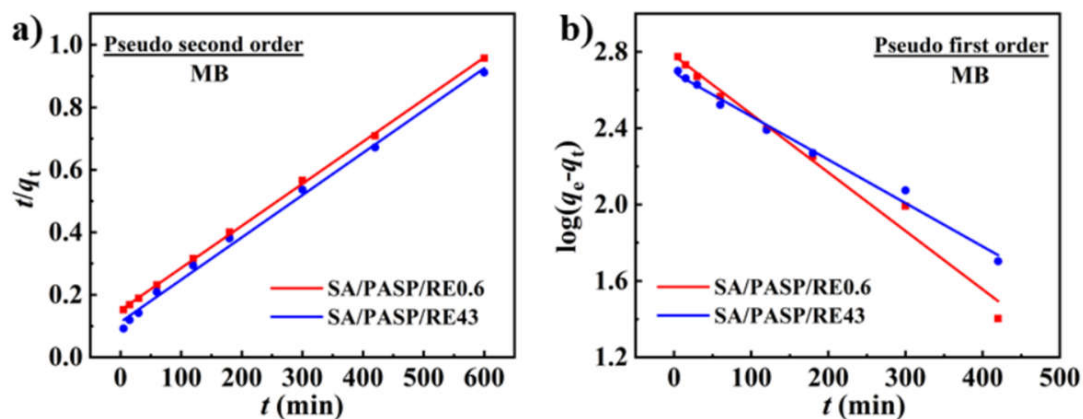

**Figure S7.** The linear fitting curves with pseudo-second order (a) and pseudo-first order (b) kinetic models for the adsorption of MB onto the SA/PASP/RE0.6 and SA/PASP/RE43 beads.

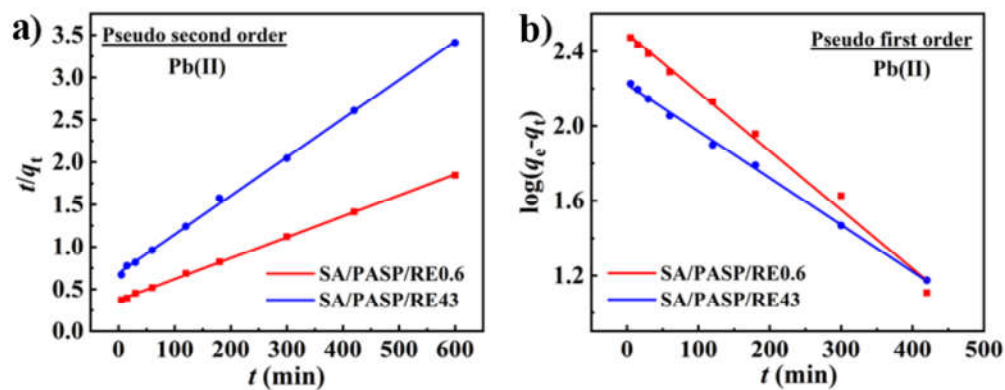

**Figure S8.** The linear fitting curves with pseudo-first order (a) and pseudo-second order (b) kinetic models for the adsorption of Pb(II) onto the SA/PASP/RE0.6 and SA/PASP/RE43 beads.

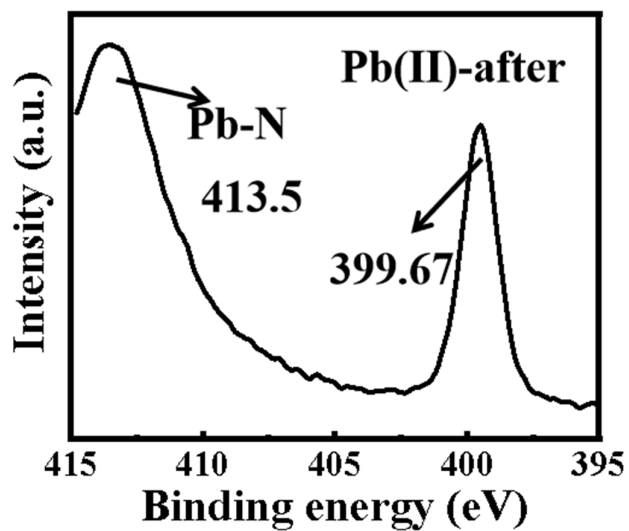

**Figure S9.** N1s spectra before and after adsorption of Pb(II).



### Part III. Supplementary Tables

**Table S1.** Two-parameter adsorption model of the adsorption of MB and Pb(II) onto the composite beads.

| Adsorbates | Samples       | Langmuir     |                 |        | Freundlich   |      |        |
|------------|---------------|--------------|-----------------|--------|--------------|------|--------|
|            |               | $K_L$ (L/mg) | $Q_m$<br>(mg/g) | $R^2$  | $K_F$ (L/mg) | $n$  | $R^2$  |
| MB         | SA/PASP/RE0.6 | 0.035        | 735.29          | 0.9997 | 2.064        | 3.06 | 0.8942 |
|            | SA/PASP/RE43  | 0.073        | 666.67          | 0.9995 | 1.844        | 1.28 | 0.9362 |
| Pb(II)     | SA/PASP/RE0.6 | 0.021        | 353.36          | 0.9996 | 2.156        | 6.46 | 0.5243 |
|            | SA/PASP/RE43  | 0.102        | 193.05          | 0.9992 | 1.961        | 8.69 | 0.9826 |

**Table S2.** Three-parameter adsorption model of the adsorption of MB and Pb(II) onto the composite beads.

| Adsorbates | Samples       | Sips        |           |              |        |
|------------|---------------|-------------|-----------|--------------|--------|
|            |               | $K_s$ (L/g) | $\beta_s$ | $a_s$ (L/mg) | $R^2$  |
| MB         | SA/PASP/RE0.6 | 14.8425     | 1.2211    | 0.0209       | 0.9977 |
|            | SA/PASP/RE43  | 36.1505     | 0.8465    | 0.0545       | 0.9943 |
| Pb(II)     | SA/PASP/RE0.6 | 0.1151      | 1.3266    | 0.0003       | 0.9959 |
|            | SA/PASP/RE43  | 85.955      | 0.8533    | 0.4296       | 0.9932 |

**Table S3.** Adsorption kinetic parameters for the adsorption of MB and Pb(II) ions onto the composite beads.

| Adsorbates | Samples       | Pseudo-first-order model                  |                         |        | Pseudo-second order model                 |                         |        |
|------------|---------------|-------------------------------------------|-------------------------|--------|-------------------------------------------|-------------------------|--------|
|            |               | $K_1 \times 10^2$<br>(min <sup>-1</sup> ) | $q_{e,cal,1}$<br>(mg/g) | $R^2$  | $K_2 \times 10^5$<br>(min <sup>-1</sup> ) | $q_{e,cal,2}$<br>(mg/g) | $R^2$  |
| MB         | SA/PASP/RE0.6 | 0.0070                                    | 602.56                  | 0.9790 | 1.24                                      | 729.93                  | 0.9995 |
|            | SA/PASP/RE45  | 0.0052                                    | 489.33                  | 0.9921 | 0.99                                      | 636.94                  | 0.9965 |
| Pb(II)     | SA/PASP/RE0.6 | 0.0073                                    | 309.03                  | 0.9926 | 1.64                                      | 404.86                  | 0.9996 |
|            | SA/PASP/RE45  | 0.0058                                    | 165.96                  | 0.9984 | 3.01                                      | 219.30                  | 0.9991 |

## References

- [77] Ho, Y.S.; McKay, G. A comparison of chemisorption kinetic models applied to pollutant removal on various sorbents. *Process Saf. Environ.* **1998**, *76*, 332-340.
- [78] Al-Ghouti, M.A.; Da'ana, D.A. Guidelines for the use and interpretation of adsorption isotherm models: A review. *J. Hazard. Mater.* **2020**, *393*, 122383.
- [79] Fernandes, E.P.; Silva, T.S.; Carvalho, C.M.; Selvasembian, R.; Chaukura, N.; Oliveira, L.M.T.M.; Meneghetti, S.M.P.; Meili, L. Efficient adsorption of dyes by  $\gamma$ -alumina synthesized from aluminum wastes: Kinetics, isotherms, thermodynamics and toxicity assessment. *J. Environ. Chem. Eng.* **2021**, *9*, 106198.
- [80] Deng, J.L.; Yang, L.L.; Liang, G.Z. Preparation, characterization and swelling behaviors sodium alginate-graft-acrylic acid/ $\text{Na}^+$  rectorite superabsorbent composites. *J. Inorg. Organomet. Polym. Mater.* **2013**, *23*, 525-532.
